# Supplementary material for: Speech as an Objective Marker of Depression and Associated Cognitive Difficulties
Source: Research Square preprint supplement (doi:10.21203/rs.3.rs-6778031/v1), 2025-06-11
Supplement: Supplementary file 1 [file 06c630dd0605da3fcdfe2054.docx]

Supplementary Material

Table of Contents

[Figure S1. Correlation matrix of speech features 2](#_Toc199342593)

[Table S1. Pairwise Pearson correlation significance (p-values) for speech variables. 3](#_Toc199342594)

[Figure S2. Differences in speech features between individuals with Major Depressive Disorder (MDD) and non-depressed controls. 4](#_Toc199342595)

[Table S2. Full ANCOVA results for each speech feature, adjusting for sex, age, total audio duration, education years, and testing location. 5](#_Toc199342596)

[Table S3. Results from receiver operating characteristic analysis of speech features for detecting depression. 9](#_Toc199342597)

[10](#_Toc199342598)

[Figure S3. Associations between speech features and depression severity, as measured by the HAMD-17 scores. 10](#_Toc199342599)

[Table S4. Full linear model results examining associations between speech features and HAMD-17 depression scores, adjusting for sex, age, total audio duration, education years, and testing location. 12](#_Toc199342600)

[Figure S4. Associations between speech features and performance on the executive control task, as measured by reaction time (RT). 16](#_Toc199342601)

[Table S5. Full linear model results examining associations between speech features and anti-saccade RTs, adjusting for sex, age, total audio duration, education years, and testing location. 18](#_Toc199342602)

[Table S6. Stepwise covariate sensitivity analysis for associations between speech features and anti-saccade reaction times. 22](#_Toc199342603)

[Table S7. Demographic and Clinical Characteristics by IPAST Completion Status 23](#_Toc199342604)


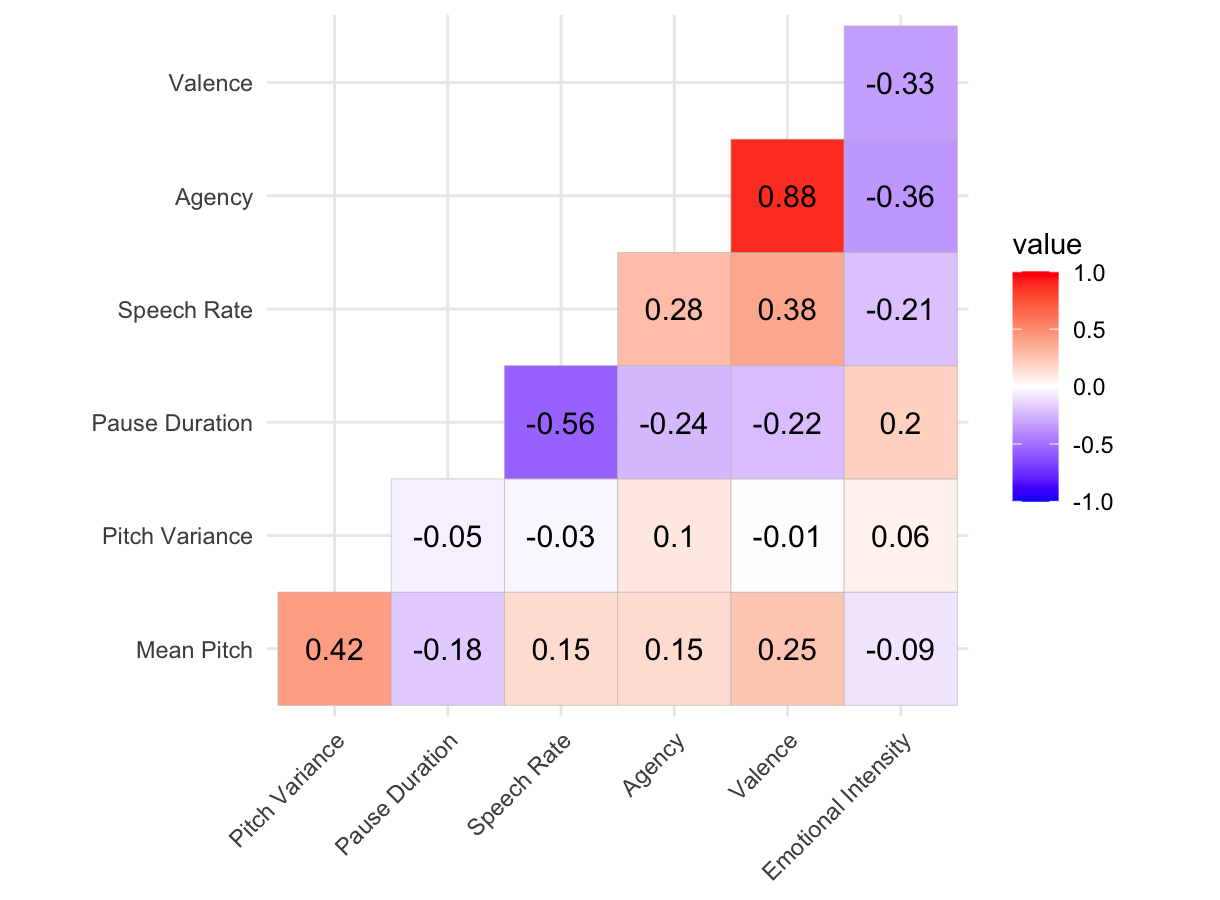


***

***

***

***

***

***

**

**

**

*

*

*

*

# **Figure S1. Correlation matrix of speech features**

Note. All values represent Pearson *r* coefficients between features. ***, *p* ≤ .001; ** *p* ≤ .01; *, *p* ≤ .05.

# **Table S1. Pairwise Pearson correlation significance (p-values) for speech variables.**

| **Feature 1** | **Feature 2** | **p** |
| --- | --- | --- |
| Valence | Emotional intensity | **<0.001** |
| Agency | **<0.001** |
| Mean pitch | **0.005** |
| Pitch variance | 0.94 |
| Pause duration | **0.02** |
| Speech rate | **<0.001** |
| Emotional intensity | Agency | **<0.001** |
| Mean pitch | 0.31 |
| Pitch variance | 0.50 |
| Pause duration | **0.03** |
| Speech rate | **0.02** |
| Agency | Mean pitch | 0.11 |
| Pitch variance | 0.28 |
| Pause duration | **0.008** |
| Speech rate | **0.002** |
| Mean pitch | Pitch variance | **<0.001** |
| Pause duration | **0.05** |
| Speech rate | 0.10 |
| Pitch variance | Pause duration | 0.59 |
| Speech rate | 0.73 |
| Pause duration | Speech rate | **<0.001** |


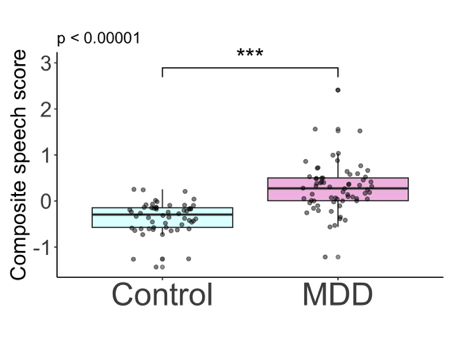

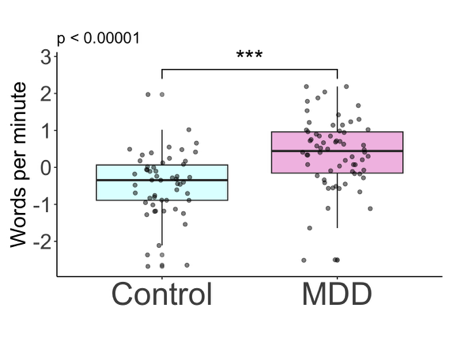

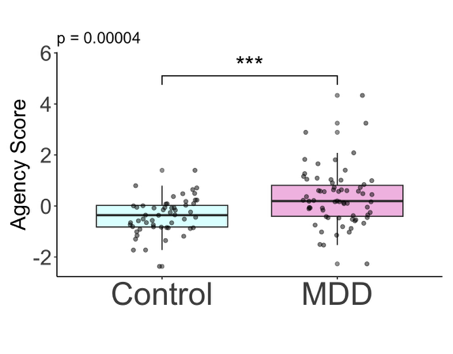

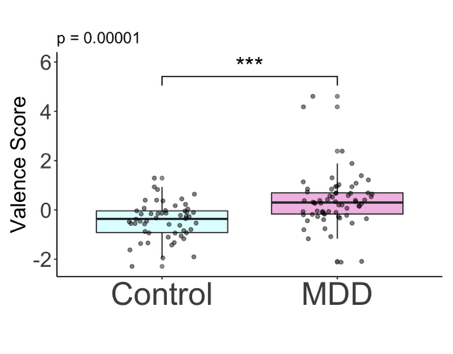

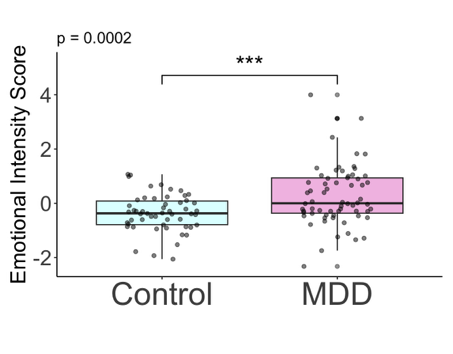

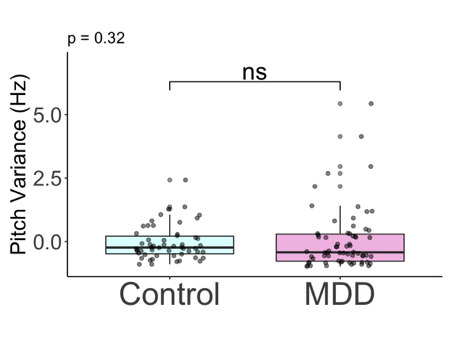

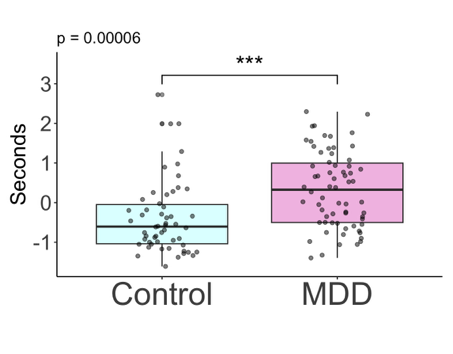

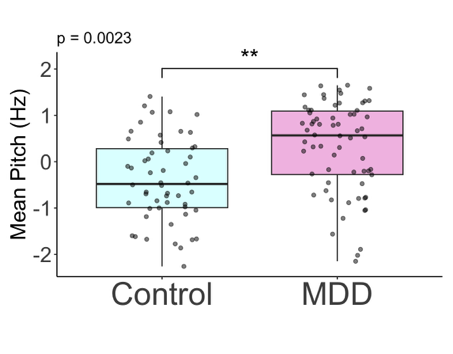


D)

G)

A)

B)

C)

F)

E)

H)

F)

E)

# **Figure S2. Differences in speech features between individuals with Major Depressive Disorder (MDD) and non-depressed controls.**

Relative to controls, individuals with depression **A)** used significantly more negatively valenced language (F = 21.1, p <0.001, n2=0.16), **B)** used language that was significantly more emotionally intense (F = 14.9, p <0.001, n2=0.12), **C)** exhibited significantly lower agency in their language (F = 18.1, p <0.001, n2=0.14), **D)** spoke with a significantly lower mean pitch (F = 9.7, p = 0.002, n2=0.08), **E)** did not differ in pitch variance (F = 1.0, p=0.32, n2 = 0.008). **F)** paused significantly more (F = 17.4, p <0.001, n2=0.13), **G)** spoke significantly slower (F = 26.9, p <0.001, n2=0.19), and **H)** had significantly higher speech composite scores (F=56.2, p < 0.001, n2 = 0.33). Abbreviations. MDD = Major Depressive Disorder, S = seconds, Hz = Hertz, SD = standard deviation.

# **Table S2. Full ANCOVA results for each speech feature, adjusting for sex, age, total audio duration, education years, and testing location.**

| **Speech Feature** | **Predictor** | **F-value** | **p-value** | **Partial Eta Squared** |
| --- | --- | --- | --- | --- |
| **Valence** | Group | 14.35 | **0.0002** | 0.038 |
|  | Sex | 0.01 | 0.911 | <0.001 |
|  | Age | 3.88 | 0.051 | 0.010 |
|  | Audio duration (s) | 0.33 | 0.564 | 0.001 |
|  | Education, years | 0.87 | 0.354 | 0.002 |
|  | Testing location (in-person vs. remote) | 0.71 | 0.401 | 0.002 |
|  | Age learned English | 1.14 | 0.289 | 0.009 |
| **Emotional intensity** | Group | 6.19 | **0.014** | 0.013 |
|  | Sex | 0.27 | 0.607 | 0.001 |
|  | Age | 0.97 | 0.326 | 0.002 |
|  | Audio duration (s) | 1.58 | 0.212 | 0.003 |
|  | Education, years | 0.00 | 0.950 | <0.001 |
|  | Testing location (in-person vs. remote) | 2.65 | 0.107 | 0.006 |
|  | Age learned English | 2.76 | 0.100 | 0.023 |
| **Agency** | Group | 9.91 | **0.002** | 0.014 |
|  | Sex | 0.52 | 0.471 | 0.001 |
|  | Age | 2.27 | 0.134 | 0.003 |
|  | Audio duration (s) | 0.09 | 0.759 | <0.001 |
|  | Education, years | 0.12 | 0.728 | <0.001 |
|  | Testing location (in-person vs. remote) | 1.37 | 0.244 | 0.002 |
|  | Age learned English | 0.17 | 0.685 | 0.001 |
| **Mean pitch** | Group | 7.09 | **0.009** | 0.023 |
|  | Sex | 89.41 | **<0.00001** | 0.287 |
|  | Age | 2.26 | 0.136 | 0.007 |
|  | Audio duration (s) | 1.43 | 0.234 | 0.005 |
|  | Education, years | 0.86 | 0.355 | 0.003 |
|  | Testing location (in-person vs. remote) | 0.37 | 0.547 | 0.001 |
|  | Age learned English | 0.40 | 0.528 | 0.003 |
| **Pitch variance** | Group | 1.47 | 0.227 | 0.011 |
|  | Sex | 3.88 | 0.051 | 0.029 |
|  | Age | 2.84 | 0.095 | 0.021 |
|  | Audio duration (s) | 0.59 | 0.443 | 0.004 |
|  | Education, years | 1.22 | 0.271 | 0.009 |
|  | Testing location (in-person vs. remote) | 2.76 | 0.10 | 0.021 |
|  | Age learned English | 0.02 | 0.900 | <0.001 |
| **Pause duration** | Group | 5.19 | **0.025** | 0.038 |
|  | Sex | 0.04 | 0.838 | 0.000 |
| Age | 0.13 | 0.720 | 0.001 |
| Audio duration (s) | 3.81 | 0.053 | 0.028 |
| Education, years | 0.93 | 0.337 | 0.007 |
| Testing location (in-person vs. remote) | 4.19 | **0.043** | 0.031 |
| Age learned English | 0.95 | 0.333 | 0.0008 |
| **Speech rate** | Group | 13.33 | **0.0004** | 0.095 |
| Sex | 1.41 | 0.238 | 0.010 |
| Age | 0.38 | 0.540 | 0.003 |
| Audio durations(s) | 0.22 | 0.639 | 0.002 |
| Education, years | 0.01 | 0.925 | <0.001 |
| Testing location (in-person vs. remote) | 2.17 | 0.144 | 0.015 |
| Age learned English | 0.55 | 0.097 | 0.005 |
| **Speech composite score** | | Group | 56.17 | **< 0.0001** | 0.328 |
|  | | Sex | 0.52 | 0.474 | 0.004 |
|  | | Age | 2.82 | 0.096 | 0.024 |
|  | | Audio duration (s) | 0.96 | 0.327 | 0.008 |
|  | | Education, years | 0.001 | 0.975 | <0.001 |
|  | | Testing location (in-person vs. remote) | 3.37 | 0.069 | 0.015 |
|  | | Age learned English | 1.40 | 0.233 | 0.014 |

# **Table S3. Results from receiver operating characteristic analysis of speech features for detecting depression.**

| **Speech Feature** | **AUC** | **95% CI Lower** | **95% CI Upper** |
| --- | --- | --- | --- |
| Valence | | 0.79 | 0.71 | 0.85 ​ |
| Emotional intensity | | 0.73 | 0.64 | 0.82 |
| Agency | | 0.77 | 0.68 | 0.85 |
| Mean pitch (Hz) | 0.72​ | 0.63​ | 0.81​ |
| Pitch variance (Hz) | 0.61​ | 0.50 | 0.71 |
| Pause duration (s) | 0.74 | 0.65 | 0.83 |
| Speech rate (words/min) | 0.78 | 0.70 | 0.86 |
| Speech Composite | 0.88 | 0.82 | 0.94 |

Note. AUC = Area under the curve. CI = Confidence interval


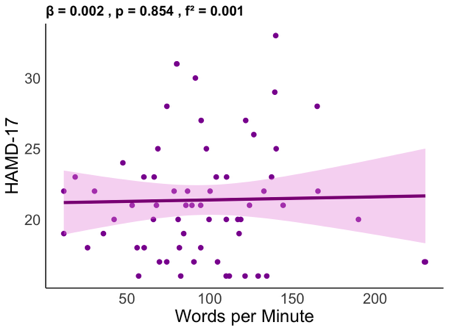

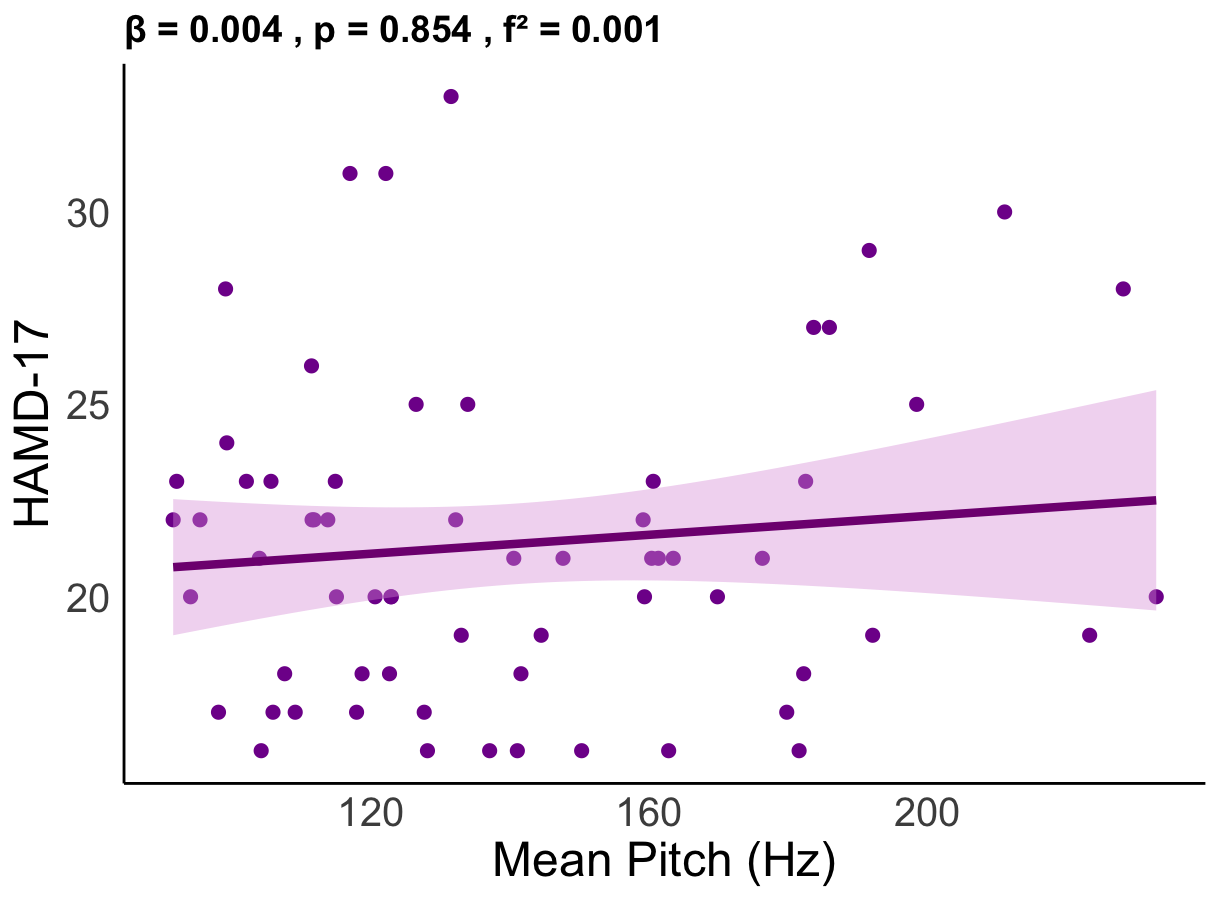

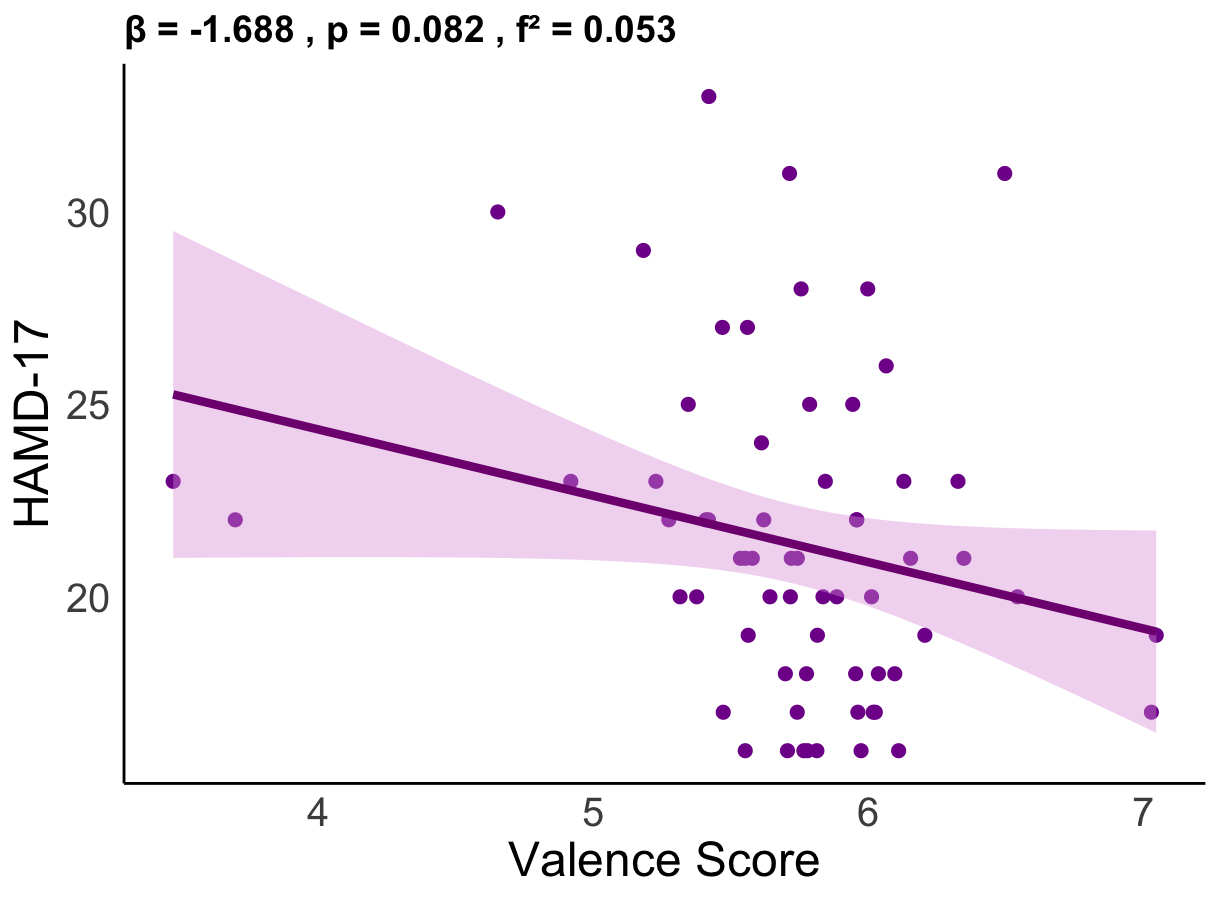

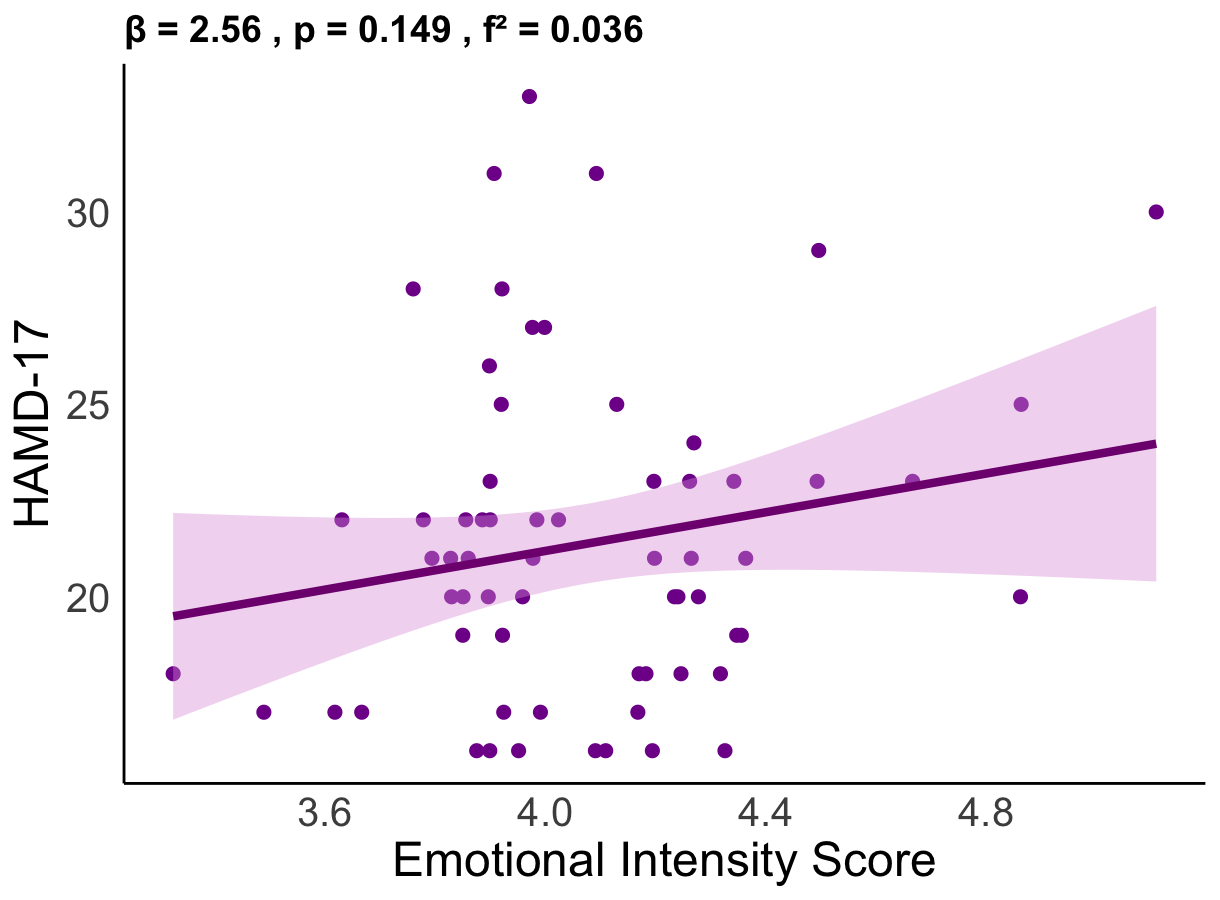

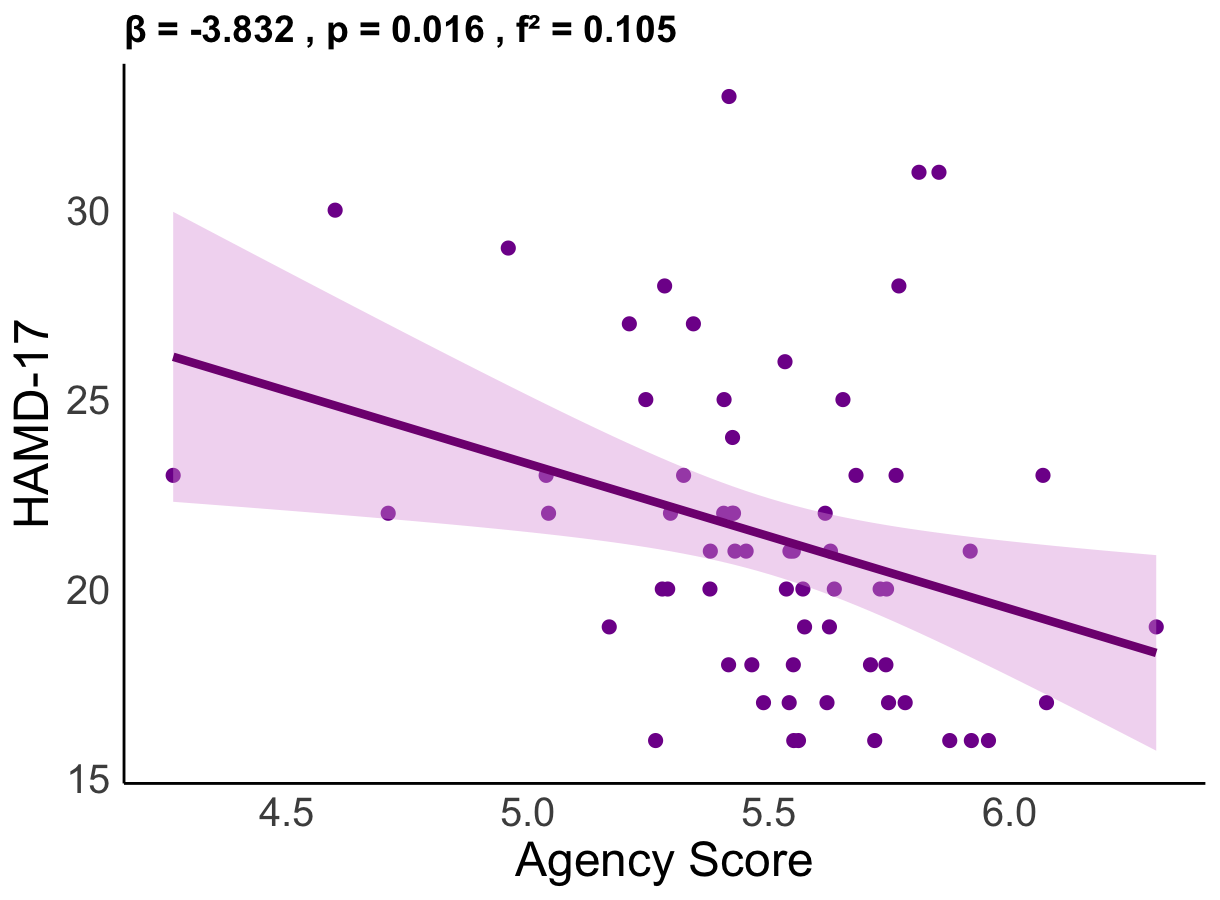

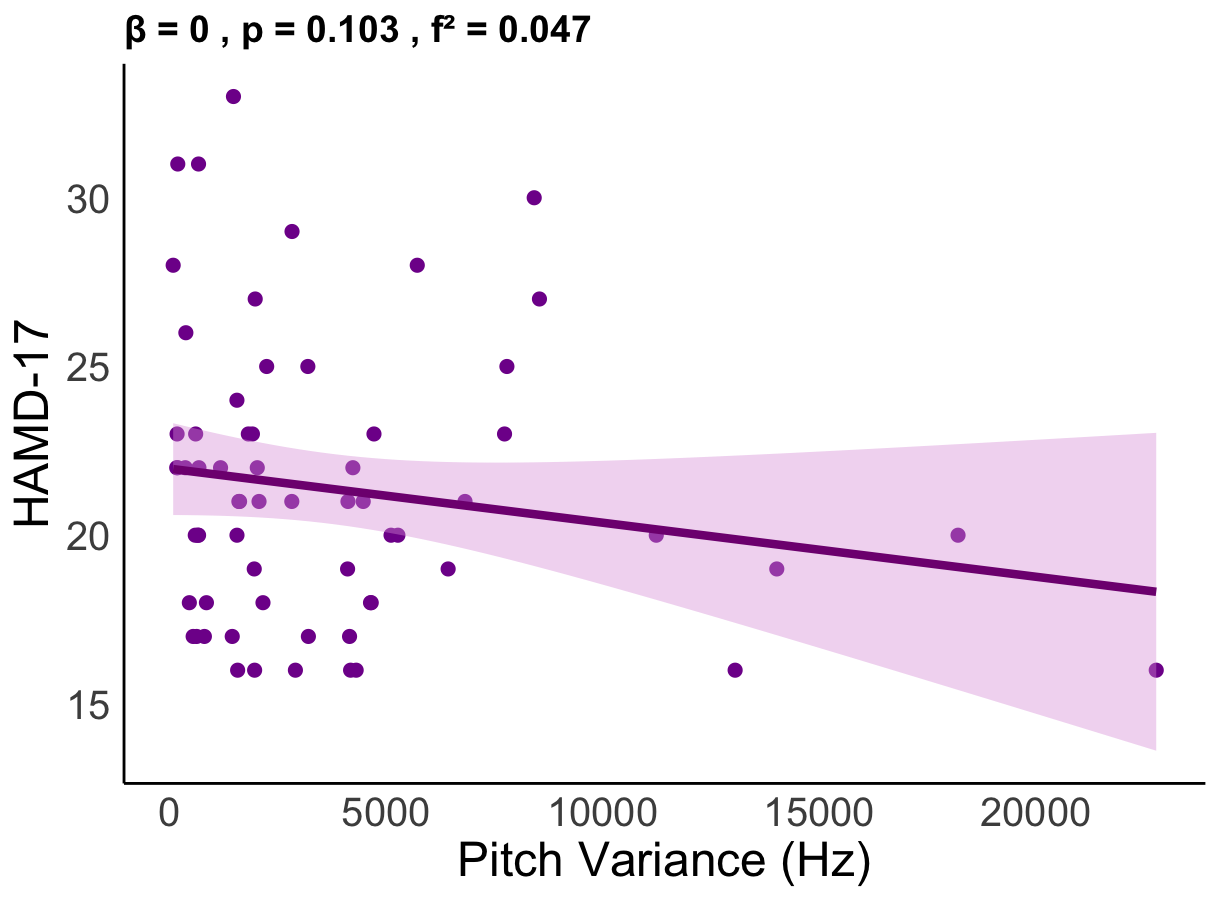

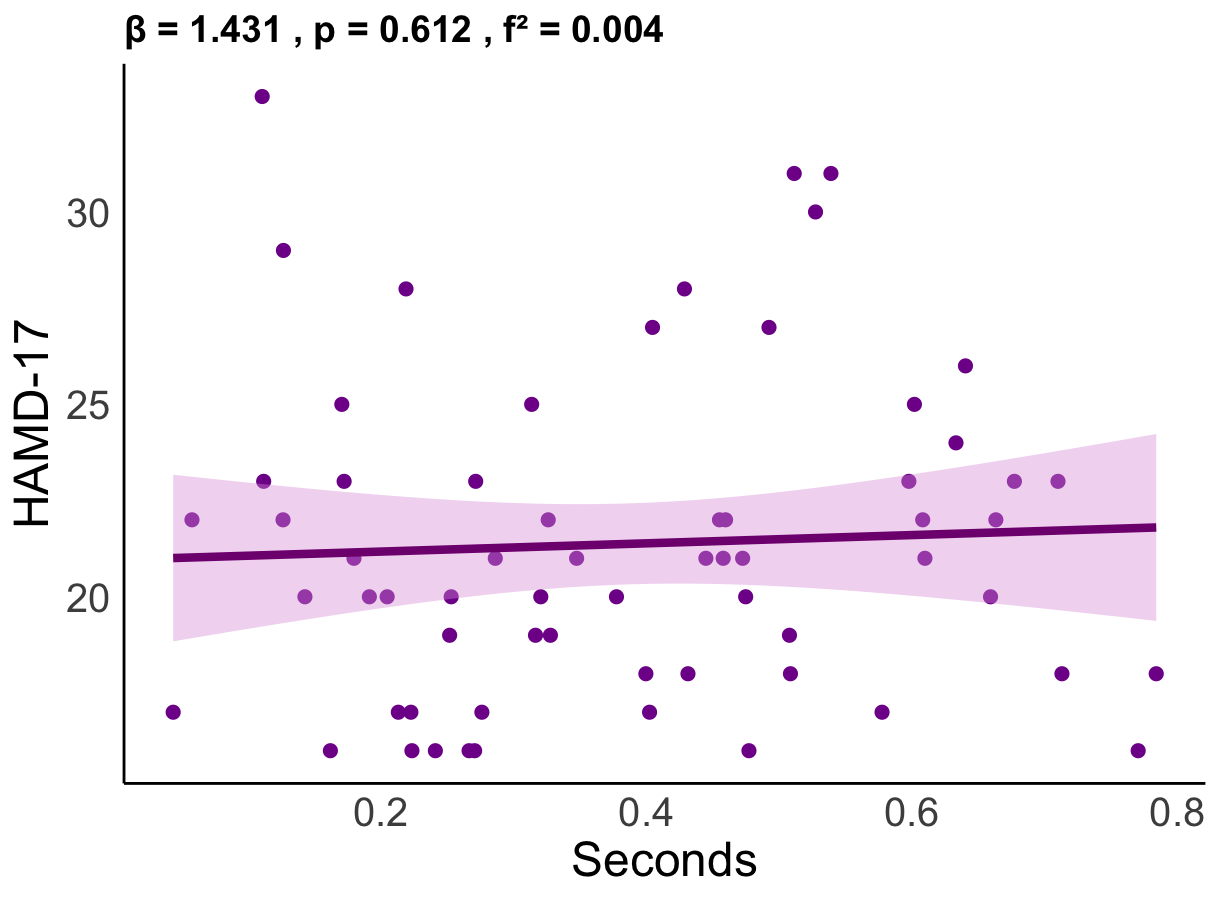

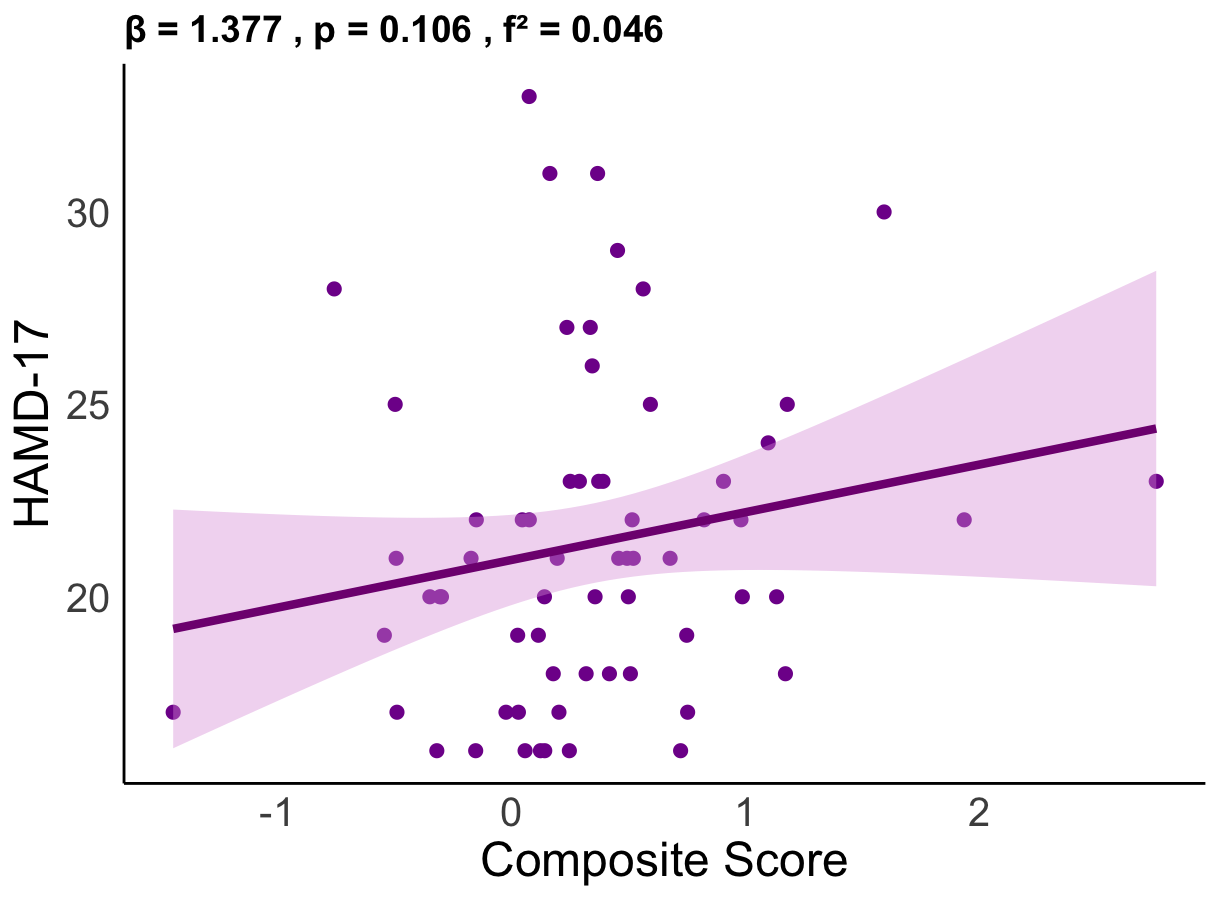


A)

B)

C)

D)

E)

F)

G)

H)

# **Figure S3. Associations between speech features and depression severity, as measured by the HAMD-17 scores.**

**A)** There was no association between more negatively valenced language and greater depression severity (p=0.08, f2 = 0.05). **B)** There was no association between language that was more emotionally intense and greater depression severity (p = 0.15, f2 = 0.04). **C)** Lower agency in language was significantly related to greater depression severity (p=0.02, f2 = 0.10). **D)** There was no association between mean pitch and depression severity (p = 0.90, f2 = 0.001). **E)** There was no association between pitch variance and depression severity (p = 0.10, f2 = 0.05). **F)** There was no association between pauses and depression severity (p = 0.61, f2 = 0.004). **G)** There was no association between speech rate and depression severity (p = 0.85, f2 = 0.001). **H)** There was no association between the speech composite score and depression severity (p=0.11, f2 = 0.05). Abbreviations. HAMD-17 = Hamilton Depression Rating Scale, S = seconds, Hz = Hertz, SD = standard deviation.

# **Table S4. Full linear model results examining associations between speech features and HAMD-17 depression scores, adjusting for sex, age, total audio duration, education years, and testing location.**

| **Speech Feature** | **Predictor** | **Estimate *(β)*** | **t** | **p** | **f²** |
| --- | --- | --- | --- | --- | --- |
| **Valence** | Valence | -1.78 | -1.87 | 0.067 | 0.06 |
| Sex | -0.76 | -0.70 | 0.489 | 0.01 |
| Age | 0.003 | 0.09 | 0.930 | < 0.001 |
| Audio durations (s) | 0.01 | 0.67 | 0.506 | 0.01 |
| Education, years | -0.05 | -0.20 | 0.843 | 0.001 |
| Testing location (in-person vs. remote) | -1.55 | -1.33 | 0.188 | 0.03 |
|  | Age learned English | 0.06 | 0.47 | 0.640 | 0.01 |
| **Emotional intensity** | Emotional intensity | 2.33 | 1.31 | 0.196 | 0.03 |
| Sex | -0.47 | -0.42 | 0.678 | 0.003 |
| Age | -0.01 | -0.29 | 0.770 | 0.002 |
| Audio durations (s) | 0.01 | 0.93 | 0.359 | 0.02 |
| Education, years | -0.06 | -0.24 | 0.812 | 0.001 |
| Testing location (in-person vs. remote) | -1.20 | -1.01 | 0.317 | 0.02 |
|  | Age learned English | 0.04 | 0.33 | 0.741 | 0.002 |
| **Agency** | Agency | -3.86 | -2.50 | 0.015 | 0.11 |
| Sex | -0.67 | -0.63 | 0.532 | 0.02 |
| Age | 0.004 | 0.12 | 0.904 | < 0.001 |
| Audio durations (s) | 0.01 | 0.83 | 0.410 | 0.01 |
| Education, years | -0.04 | -0.15 | 0.880 | < 0.001 |
| Testing location (in-person vs. remote) | -1.46 | -1.29 | 0.202 | 0.03 |
|  | Age learned English | 0.04 | 0.34 | 0.732 | 0.003 |
| **Mean pitch** | Mean pitch | 0.01 | 0.25 | 0.806 | 0.001 |
| Sex | -0.49 | -0.33 | 0.744 | 0.002 |
| Age | -0.01 | -0.36 | 0.722 | 0.002 |
| Audio durations (s) | 0.01 | 0.67 | 0.509 | 0.01 |
| Education, years | -0.02 | -0.09 | 0.930 | < 0.001 |
| Testing location (in-person vs. remote) | -1.47 | -1.22 | 0.226 | 0.03 |
|  | Age learned English | 0.03 | 0.21 | 0.833 | 0.001 |
| **Pitch variance** | Pitch variance | <0.001 | -1.49 | 0.143 | 0.04 |
| Sex | -1.18 | -1.04 | 0.304 | 0.02 |
| Age | -0.02 | -0.51 | 0.612 | 0.01 |
| Audio duration (s) | 0.01 | 0.65 | 0.517 | 0.01 |
| Education, years | -0.14 | -0.55 | 0.587 | 0.01 |
| Testing location (in-person vs. remote) | -0.90 | -0.73 | 0.469 | 0.01 |
|  | Age learned English | 0.022 | 0.19 | 0.854 | 0.001 |
| **Pause duration** | Pause duration (s) | 0.45 | 0.15 | 0.880 | < 0.001 |
| Sex | -0.75 | -0.67 | 0.506 | 0.01 |
| Age | -0.01 | -0.35 | 0.725 | 0.002 |
| Audio duration (s) | 0.01 | 0.67 | 0.505 | 0.01 |
| Education, years | -0.03 | -0.12 | 0.908 | < 0.001 |
| Testing location (in-person vs. remote) | -1.39 | -1.13 | 0.263 | 0.02 |
|  | Age learned English | 0.03 | 0.23 | 0.823 | 0.001 |
| **Speech rate** | Speech rate (words/min) | 0.01 | 0.49 | 0.623 | 0.004 |
| Sex | -0.77 | -0.68 | 0.497 | 0.01 |
| Age | -0.01 | -0.32 | 0.754 | 0.002 |
| Audio duration (s) | 0.01 | 0.63 | 0.533 | 0.01 |
| Education, years | -0.03 | -0.12 | 0.908 | < 0.001 |
| Testing location (in-person vs. remote) | -1.57 | -1.29 | 0.203 | 0.03 |
|  | Age learned English | 0.03 | 0.21 | 0.838 | 0.001 |
| **Composite speech score** | | Score | 0.97 | 0.85 | 0.398 | 0.016 |
| Sex | -0.969 | -0.74 | 0.465 | 0.014 |
| Age | <0.001 | 0.01 | 0.994 | < 0.001 |
| Audio duration (s) | -0.002 | -0.07 | 0.946 | 0.012 |
| Education, years | -0.004 | -0.01 | 0.989 | < 0.001 |
| Testing location (in-person vs. remote) | -1.28 | -0.94 | 0.355 | 0.019 |
|  | | Age learned English | 0.04 | 0.33 | 0.744 | 0.019 |


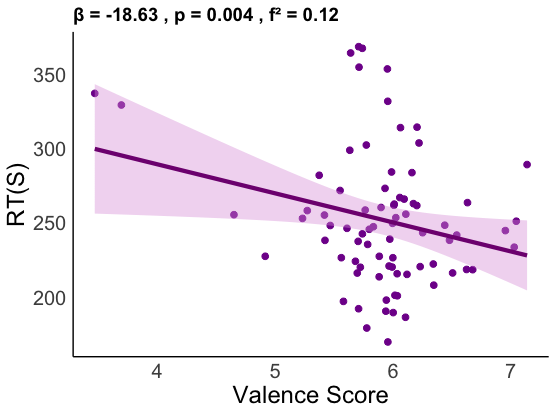

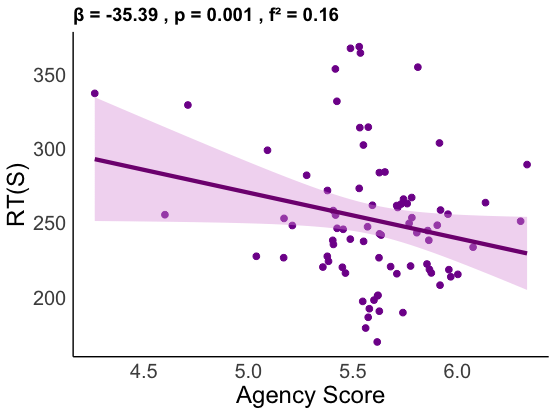

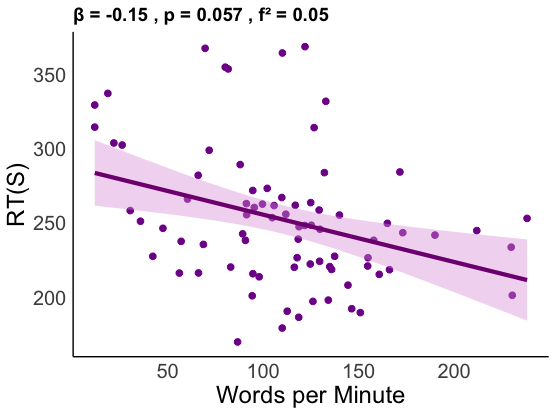

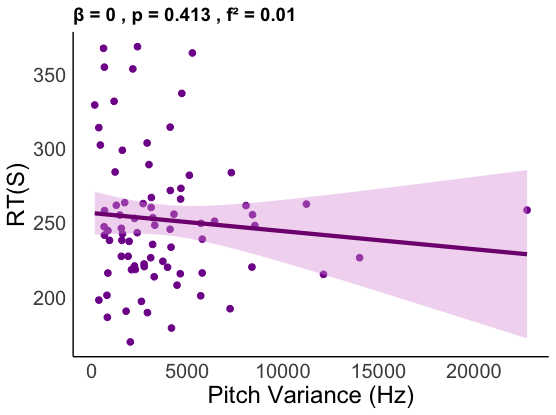

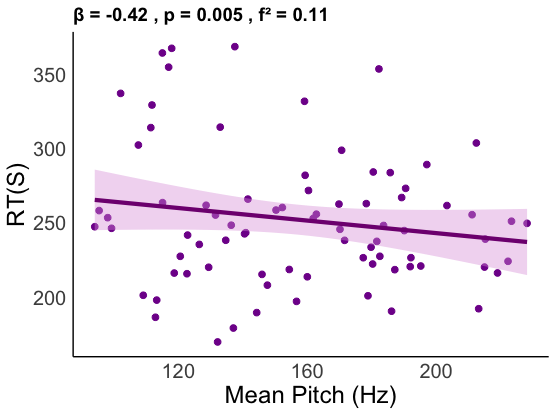

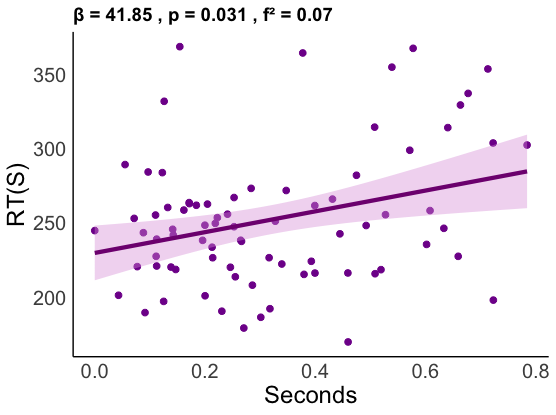

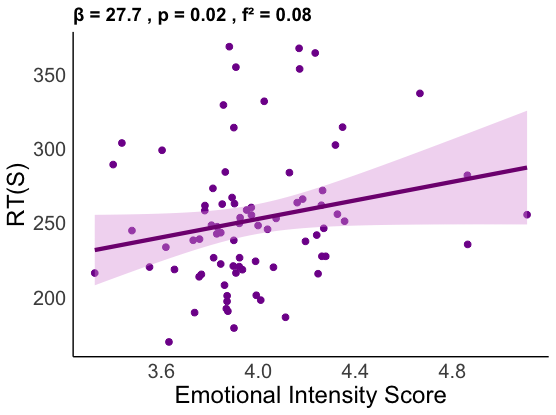


A)

B)

C)

D)

E)

F)

G)


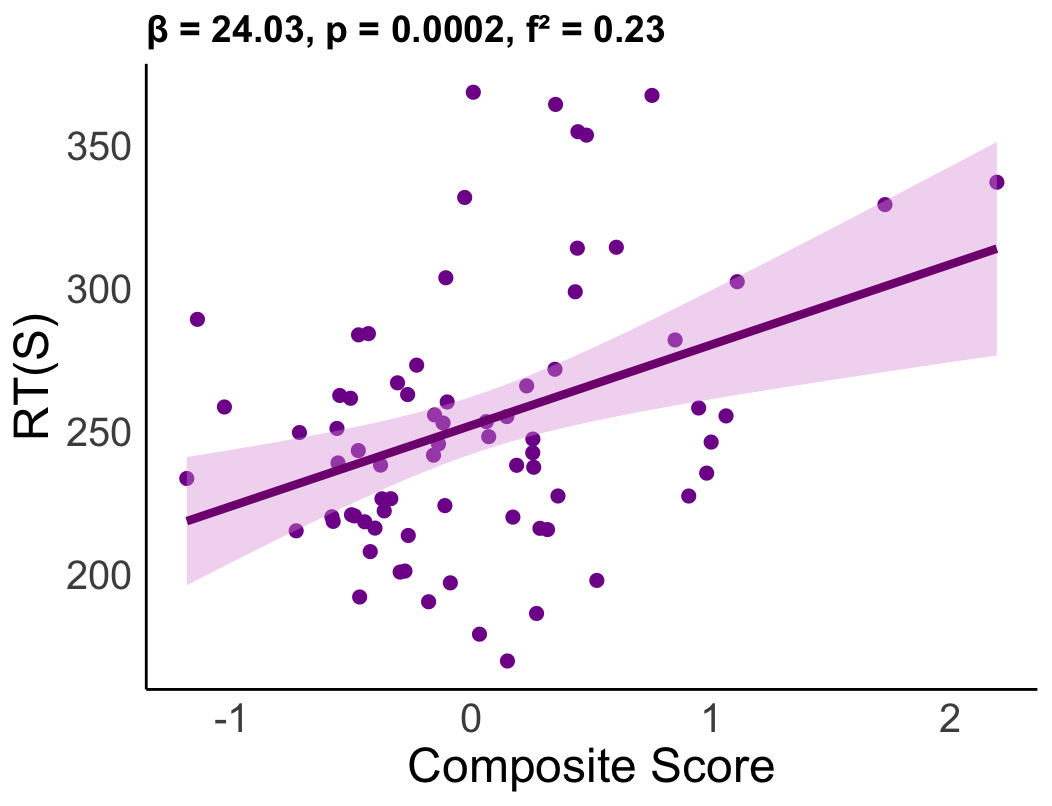


H)

# **Figure S4. Associations between speech features and performance on the executive control task, as measured by reaction time (RT).**

**A)** More negatively valenced language was associated with worse performance (p=0.004, f2 = 0.12). **B)** More emotionally intense language was associated with worse performance (p=0.02, f2 = 0.08). **C)** Language reflecting less agency was associated with worse performance (p=0.001, f2 = 0.16). **D)** Lower mean pitch was related to worse performance (p=0.005, f2 = 0.11). **E)** There was no association between pitch variance and performance (p=0.41, f2 = 0.01). **F)** Longer pauses was associated with worse performance (p=0.03, f2 = 0.07). **G)** Slower speech rate was associated with worse performance at the trend level (p=0.06, f2 = 0.05). **H)** Greater speech composite scores were associated with worse performance (p <0.001, f2=0.23). RTs = Reaction times (slower reaction time reflects worse performance), s = Seconds, Hz = Hertz, SD = standard deviation.

# **Table S5. Full linear model results examining associations between speech features and anti-saccade RTs, adjusting for sex, age, total audio duration, education years, and testing location.**

| **Speech Feature** | **Predictor** | **Estimate *(β)*** | **t** | **p** | **f²** |
| --- | --- | --- | --- | --- | --- |
| **Valence** | Valence | -15.54 | -2.42 | **0.018** | 0.083 |
| Sex | 4.89 | 0.65 | 0.516 | 0.006 |
| Age | 0.26 | 1.12 | 0.265 | 0.018 |
| Audio duration (s) | -0.12 | -0.80 | 0.427 | 0.009 |
| Education, years | -1.09 | -0.68 | 0.500 | 0.006 |
| Testing location (in-person vs. remote) | -10.24 | -1.34 | 0.184 | 0.025 |
| Age learned English | 0.34 | 0.52 | 0.602 | 0.004 |
| Pro-saccade RT | 0.76 | 9.30 | <0.0001 | 1.219 |
| **Emotional intensity** | Emotional intensity | 20.74 | 1.68 | 0.097 | 0.040 |
| Sex | 4.96 | 0.65 | 0.519 | 0.006 |
| Age | 0.16 | 0.67 | 0.507 | 0.006 |
| Audio duration (s) | -0.03 | -0.23 | 0.821 | 0.001 |
| Education, years | -1.33 | -0.81 | 0.422 | 0.009 |
| Testing location (in-person vs. remote) | -10.39 | -1.30 | 0.197 | 0.024 |
| Age learned English | 0.32 | 0.47 | 0.636 | 0.003 |
| Pro-saccade RT | 0.77 | 9.15 | <0.0001 | 1.180 |
| **Agency** | Agency | -29.93 | -2.68 | **0.009** | 0.101 |
| Sex | 6.51 | 0.87 | 0.386 | 0.011 |
| Age | 0.22 | 0.95 | 0.345 | 0.013 |
| Audio duration (s) | -0.09 | -0.62 | 0.539 | 0.005 |
| Education, years | -0.73 | -0.45 | 0.653 | 0.003 |
| Testing location (in-person vs. remote) | -9.28 | -1.22 | 0.228 | 0.021 |
| Age learned English | 0.25 | 0.39 | 0.701 | 0.002 |
| Pro-saccade RT | 0.78 | 9.57 | <0.0001 | 1.290 |
| **Mean pitch** | Mean pitch | -0.36 | -2.36 | **0.021** | 0.078 |
| Sex | -11.68 | -1.14 | 0.257 | 0.018 |
| Age | -0.01 | -0.02 | 0.981 | 0.000 |
| Audio duration (s) | -0.19 | -1.23 | 0.223 | 0.021 |
| Education, years | -1.41 | -0.87 | 0.385 | 0.011 |
| Testing location (in-person vs. remote) | -10.16 | -1.32 | 0.190 | 0.025 |
| Age learned English | 0.411 | 0.62 | 0.536 | 0.006 |
| Pro-saccade RT | 0.79 | 9.63 | <0.0001 | 1.306 |
| **Pitch variance** | Pitch variance | -0.001 | -0.61 | 0.542 | 0.005 |
| Sex | 4.39 | 0.56 | 0.575 | 0.004 |
| Age | 0.17 | 0.70 | 0.486 | 0.007 |
| Audio duration (s) | -0.08 | -0.53 | 0.595 | 0.004 |
| Education, years | -1.61 | -0.96 | 0.341 | 0.013 |
| Testing location (in-person vs. remote) | -13.61 | -1.73 | 0.087 | 0.042 |
| Age learned English | 0.22 | 0.32 | 0.747 | 0.001 |
| Pro-saccade RT | 0.78 | 9.13 | <0.0001 | 1.175 |
| **Pause duration** | Pause duration (s) | 29.03 | 1.43 | 0.156 | 0.029 |
| Sex | 2.24 | 0.28 | 0.777 | 0.001 |
| Age | 0.19 | 0.80 | 0.428 | 0.009 |
| Audio duration (s) | -0.03 | -0.16 | 0.872 | 0.000 |
| Education, years | -1.19 | -0.72 | 0.477 | 0.007 |
| Testing location (in-person vs. remote) | -11.00 | -1.37 | 0.174 | 0.027 |
| Age learned English | 0.27 | 0.41 | 0.685 | 0.002 |
| Pro-saccade RT | 0.74 | 8.59 | <0.0001 | 1.040 |
| **Speech rate** | Speech rate (words/min) | -0.10 | -1.28 | 0.205 | 0.023 |
| Sex | 5.13 | 0.67 | 0.508 | 0.006 |
| Age | 0.20 | 0.83 | 0.407 | 0.010 |
| Audio duration (s) | -0.06 | -0.41 | 0.680 | 0.002 |
| Education, years | -1.27 | -0.76 | 0.449 | 0.008 |
| Testing location (in-person vs. remote) | -11.97 | -1.52 | 0.134 | 0.032 |
| Age learned English | 0.18 | 0.27 | 0.792 | 0.001 |
| Pro-saccade RT | 0.74 | 8.38 | <0.0001 | 0.990 |
| **Composite speech**  **score** | | Score | 20.65 | 2.94 | **0.005** | 1.017 |
| Sex | -1.08 | -0.14 | 0.892 | <0.0001 |
| Age | 0.08 | 0.32 | 0.749 | 0.002 |
| Audio duration (s) | -0.08 | -0.47 | 0.641 | 0.003 |
| Education, years | -1.25 | -0.75 | 0.454 | 0.009 |
| Testing location (in-person vs. remote) | -6.69 | -0.77 | 0.445 | 0.009 |
| Age learned English | 0.22 | 0.33 | 0.744 | 0.002 |
| Pro-saccade RT | 0.74 | 8.88 | <0.0001 | 1.212 |

# **Table S6. Stepwise covariate sensitivity analysis for associations between speech features and anti-saccade reaction times.**

| **Speech Feature** | **Base β** | **Base p** | **+Edu β** | **+Edu p** | **+Loc β** | **+Loc p** | **+Eng β** | **+Eng p** | **Full β** | **Full p** |
| --- | --- | --- | --- | --- | --- | --- | --- | --- | --- | --- |
| **Valence** | -18.63 | **0.004** | -17.53 | **0.007** | -15.97 | **0.014** | -18.91 | **0.004** | -15.54 | **0.018** |
| **Emotional intensity** | 27.71 | **0.021** | 25.69 | **0.032** | 21.30 | 0.087 | 28.27 | **0.020** | 20.74 | 0.097 |
| **Agency** | -35.39 | **0.001** | -33.41 | **0.003** | -30.80 | **0.006** | -35.54 | **0.001** | -29.93 | **0.009** |
| **Mean pitch** | -0.42 | **0.006** | -0.40 | **0.008** | -0.36 | **0.020** | -0.43 | **0.005** | -0.36 | **0.021** |
| **Pitch variance** | -0.001 | 0.413 | -0.001 | 0.350 | -0.001 | 0.621 | -0.001 | 0.413 | -0.001 | 0.542 |
| **Pause Duration** | 41.85 | **0.031** | 37.54 | 0.057 | 30.81 | 0.128 | 42.41 | 0.030 | 29.03 | 0.156 |
| **Speech Rate** | -0.15 | 0.057 | -0.13 | 0.093 | -0.11 | 0.176 | -0.15 | 0.059 | -0.10 | 0.205 |
| **Speech Composite** | 28.3 | **0.002** | 22.8 | **0.005** | 20.4 | **0.004** | 20.6 | **0.004** | 20.7 | **0.005** |

Note: Base models adjusted for sex, age, total audio duration, and prosaccade reaction times. Subsequent models additionally adjusted for education years, and/or testing location, and/or age learned english. Beta coefficients (β), p-values (p), and final significance status are reported.

# **Table S7. Demographic and Clinical Characteristics by IPAST Completion Status**

| **Variable** | **Mean**  **(No IPAST)** | **Mean**  **(Yes IPAST)** | **p** | **95% CI** | **Test** |
| --- | --- | --- | --- | --- | --- |
| **Age** | 48.17 | 43.14 | 0.108 | [-1.12, 11.18] | Welch t-test |
| **Education (years)** | 15.50 | 16.29 | 0.052 | [-1.60, 0.01] | Welch t-test |
| **Age English Learned** | 2.23 | 2.44 | 0.834 | [-2.20, 1.78] | Welch t-test |
| **Sex (Female %)** | 57.1% | 67.9% | 0.321 | [OR 0.28–1.53] | Fisher’s exact |
| **HAMD-171** | 21.92 | 21.03 | 0.403 | [-1.23, 3.02] | Welch t-test |

Note. IPAST, Interleaved Pro and Anti-saccade Task. HAMD-17, Hamilton Depression Rating Scale.

1 Only participants with depression completed the HAMD-17.
